# Supplementary material
Source: Springer Nature journal article supplement (https://www.springermedizin.de/resource/supplementary/12958_2013_1151_MOESM1_ESM.pdf/9566920)

**A****E-cadherin****mRNA level fold change**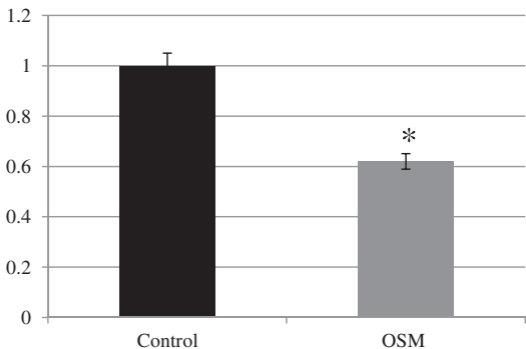**B****OSM 48 h      Control 48 h**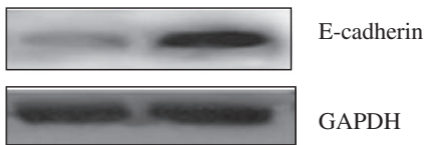**C****E-cadherin****Protein level fold change**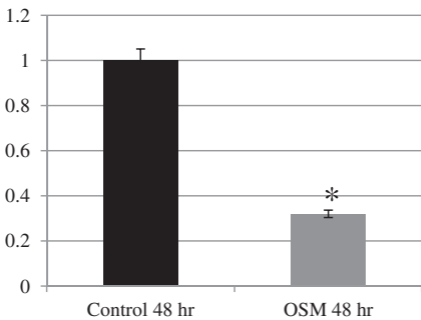

Supplement: MOESM1 [file 9566920]
